# Supplementary material for: Comparison of Technical Performance and Biological Quality of Nanofat From Eight Commercial Preparation Systems Using a Scoring Approach in a Single Donor Model
Source: Research Square preprint supplement (doi:10.21203/rs.3.rs-7973030/v1), 2025-11-13
Supplement: Supplementary file 1 [file ab1313ae0f61fcfbca4ca5e8.docx]

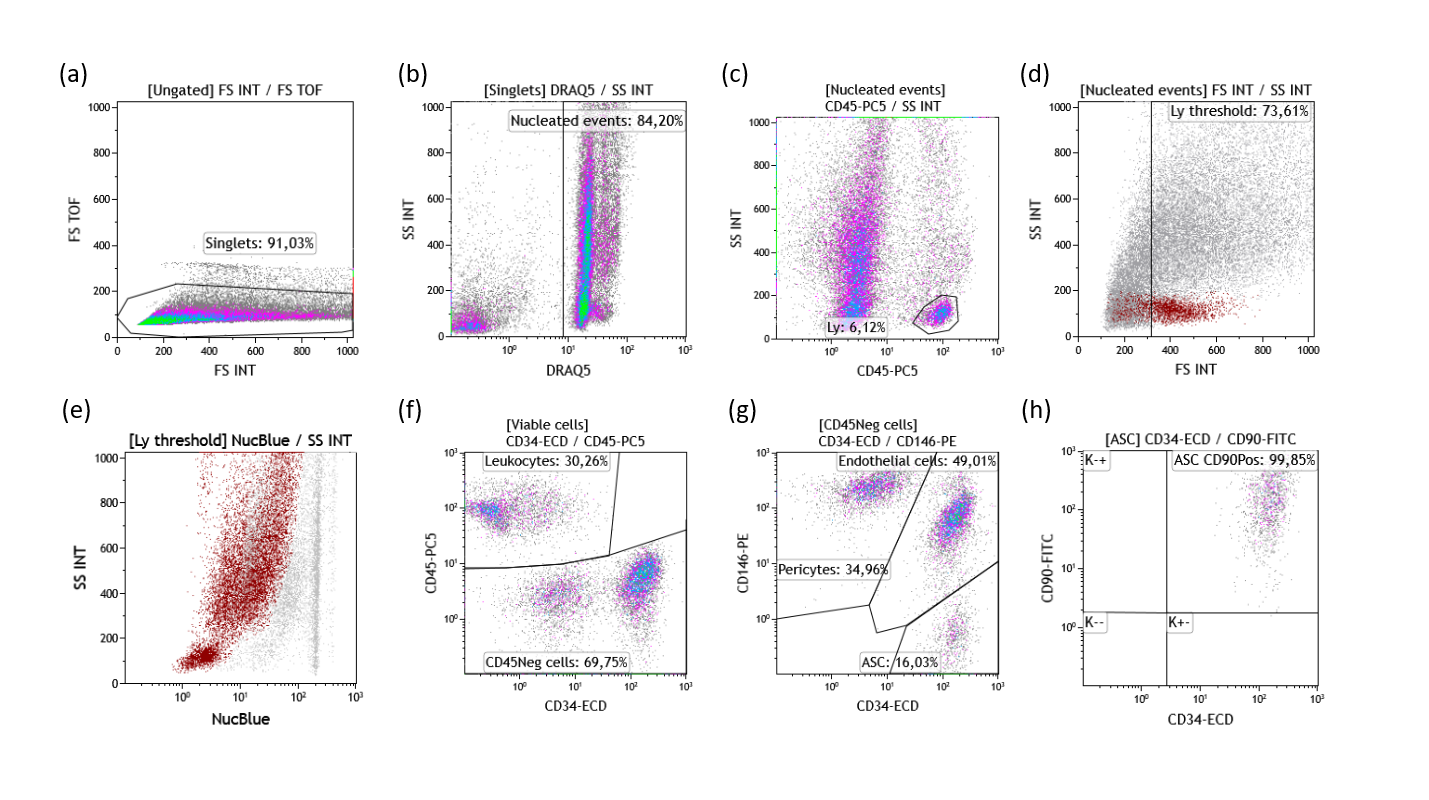
**Supplemental data**

**Supplemental Figure 1 – Gating strategy for subsets analysis of SVF**. Representative dot plots illustrate sequential gates applied to exclude aggregates (a), DRAQ5 negative debris (b), small size nucleated events (c-d), followed by selection of “NucBlue negative” live cells (e) and distribution of the main cellular subpopulations within the SVF, including leukocytes (f), endothelial cells (g), and adipose stromal/stem cells (ASC) (h).

|  |  | | | | | | | |
| --- | --- | --- | --- | --- | --- | --- | --- | --- |
| **Tulip Nanofat Kit** | **Adinizer** | **Hy-Tissue Nanofat** | **Microlyzer** | **LipoCube Nano** | **Puregraft Boost V1** | **Puregraft Boost V2** | **Emulsfat** |
| **n** | 5 | 5 | 5 | 5 | 5 | 4 | 4 | 5 |
| **Total EVs** | 41,533 [46,740] | 72,734 [61,972] | 79,417 [57,236] | 67,240 [49,794] | 57,236 [43,009] | 64,760 [55,329] | 60,496 [40,538] | 43,214 [48,421] |
| **LEVs** | 123 [103] | 164 [226] | 82 [103] | 123 [123] | 82 [82] | 103 [103] | 103 [164] | 123 [123] |
| **PEVs** | 2,009 [1,353] | 1,722 [1,435] | 1,927 [1,436] | 1,968 [1,394] | 2,419 [1,518] | 1,497 [1,179] | 2,009 [882] | 1,107 [1,640] |
| **ErEVs** | 328 [349] | 369 [410] | 451 [349] | 451 [246] | 287 [144] | 287 [267] | 328 [441] | 287 [185] |
| **EEVs** | 451 [677] | 656 [1,804] | 861 [1,456] | 902 [1,313] | 410 [903] | 389,5 [656] | 635,5 [892] | 697 [1,128] |
| **AEVs** | 2,870 [2,521] | 2,829 [2,891] | 1,599 [1,948] | 2,624 [615] | 2,214 [1,415] | 2,378 [2,625] | 2,153 [2,194] | 2,952 [1,599] |
| **ASC-Evs** | 1,517 [984] | 1,271 [2,112] | 1,476 [1,025] | 2,460 [1,743] | 1,722 [1,210] | 1,415 [1,425] | 1,517 [2,173] | 1,394 [1,230] |

**Supplemental Table 1. Quantification of extracellular vesicle (EV) subpopulations across eight fat processing methods**. Total EV concentration (EV/µL) was measured by flow cytometry and categorized into leukocyte-derived EVs (LEVs), platelet-derived EVs (PEVs), erythrocyte-derived EVs (ErEVs), endothelial-derived EVs (EEVs), adipocyte-derived EVs (AEVs), and mesenchymal stem cell-derived EVs (MSC-EVs). Data represent as median [interquartile range].

|  |  | | | | | | | |
| --- | --- | --- | --- | --- | --- | --- | --- | --- |
| **Tulip Nanofat Kit** | **Adinizer** | **Hy-Tissue Nanofat** | **Microlyzer** | **LipoCube Nano** | **Puregraft Boost V1** | **Puregraft Boost V2** | **Emulsfat** |
| **n** | 5 | 5 | 5 | 5 | 5 | 4 | 4 | 5 |
| **LEVs** | 0.10 [0.20] | 0.23 [0.19] | 0.10 [0.15] | 0.18 [0.08] | 0.18 [0.09] | 0.14 [0.09] | 0.20 [0.14] | 0.24 [0.2] |
| **PEVs** | 2.65 [4.63] | 3.08 [2.41] | 2.68 [3.89] | 2.94 [2.90] | 2.43 [4.53] | 2.98 [4.41] | 2.69 [3.68] | 2.57 [1.65] |
| **ErEVs** | 0.65 [0.20] | 0.53 [0.45] | 0.56 [1.10] | 0.71 [0.32] | 0.45 [0.41] | 0.52 [0.59] | 0.69 [0.44] | 0.75 [1.03] |
| **EEVs** | 1.08 [0.38] | 1.01 [1.65] | 0.93 [1.28] | 1.18 [1.09] | 0.85 [0.83] | 0.97 [0.79] | 1.09 [0.70] | 1.42 [1.11] |
| **AEVs** | 6.32 [4.84] | 4.97 [4.52] | 4.48 [5.34] | 6.02 [6.25] | 5.79 [5.72] | 5.61 [4.05] | 5.32 [4.49] | 8.98 [6.80] |
| **ASC-Evs** | 2.70 [1.80] | 2.0 [1,49] | 1.64 [0.63] | 2.43 [2,58] | 2.69 [1.03] | 2.22 [0.96] | 2.43 [1.87] | 2.71 [1.86] |

**Supplemental Table 2** : **Distribution of EV Subtypes Within the Annexin V⁺ Population Across Nanofat Processing Methods**. The table presents the relative proportions (%, median [IQR]) of EV subtypes within the Annexin V⁺ EV gateSubtypes include leukocyte-derived EVs (LEVs), platelet-derived EVs (PEVs), erythrocyte-derived EVs (ErEVs), endothelial EVs (EEVs), adipocyte-derived EVs (AEVs), and mesenchymal stem/stromal cell-derived EVs (MSC-EVs). Data are expressed as median [interquartile range].
